# Supplementary material for: Absence of superconductivity in I4/mmm-FeH5: experimental evidence
Source: Royal Society of Chemistry journal article supplement (doi:10.1039/d3cp05996k), 2024-01-01
Supplement: d3cp05996k1.pdf [file d3cp05996k1.pdf]

## Supplementary information

### **Absence of superconductivity in $I4/mmm$ -FeH<sub>5</sub>: experimental evidence**

Yulong Wang,<sup>a</sup> Su Chen,<sup>a</sup> Jianning Guo,<sup>a</sup> Xiaoli Huang<sup>\*a</sup> and Tian Cui<sup>a, b</sup>

<sup>a</sup> *State Key Laboratory of Superhard Materials, College of Physics, Jilin University,  
Changchun 130012, China*

<sup>b</sup> *School of Physical Science and Technology, Ningbo University, Ningbo, 315211,  
China*

\*Corresponding author, Email: huangxiaoli@jlu.edu.cn (X. Huang)

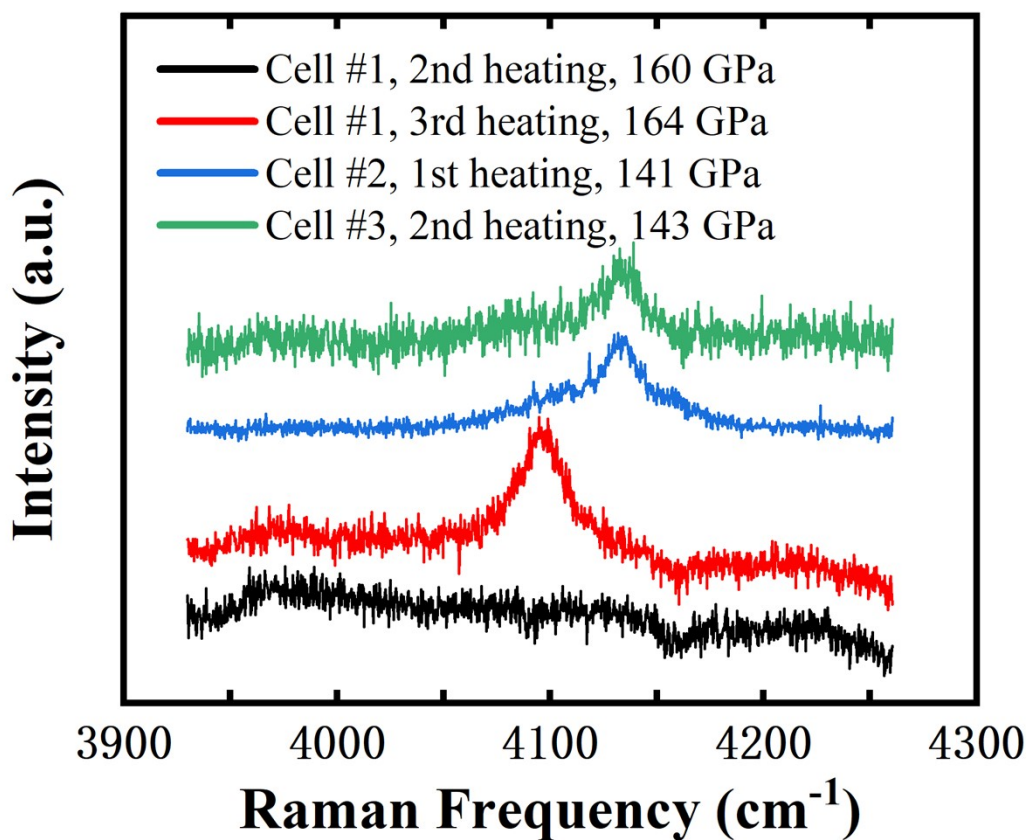

Figure S1. Raman spectra after the laser heating. The peaks at  $\sim 4100$  and  $\sim 4130$  cm<sup>-1</sup> due

to the  $\nu_1$  mode of hydrogen<sup>1-4</sup>.

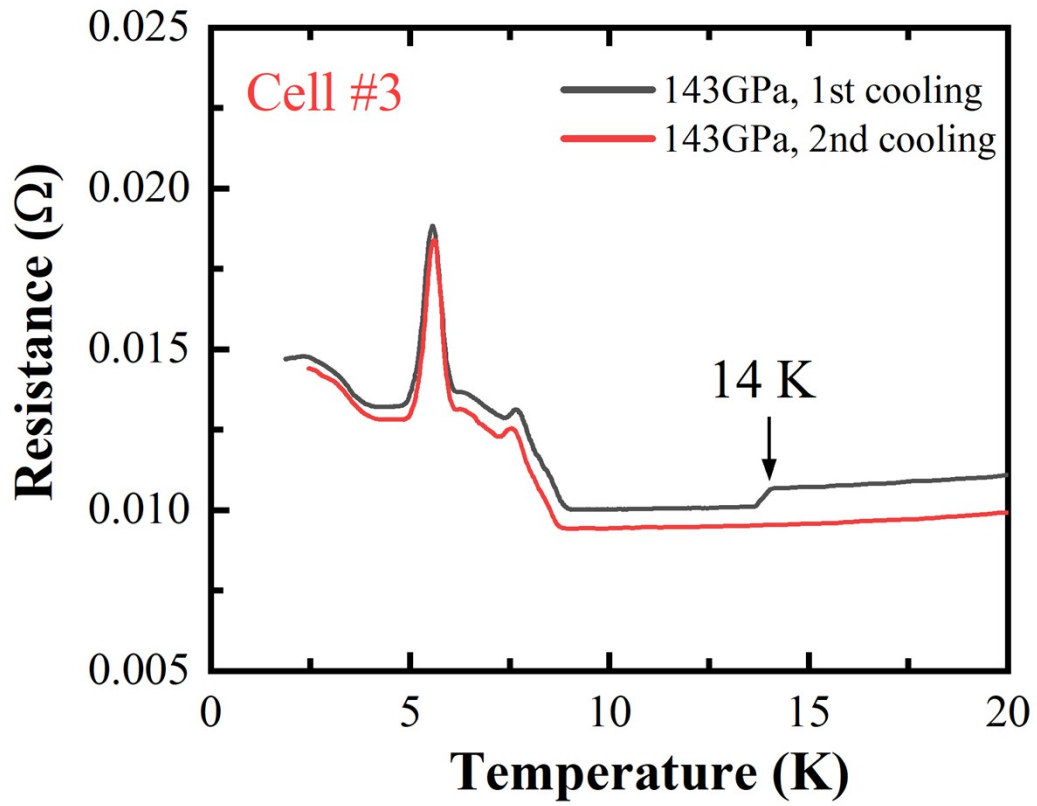

Figure S2. Two resistance measurements at 143 GPa in Cell #3. Red line and black line respectively represent the data in first and the second cooling. Except the drop in 14 K, two curves showed the same trends.

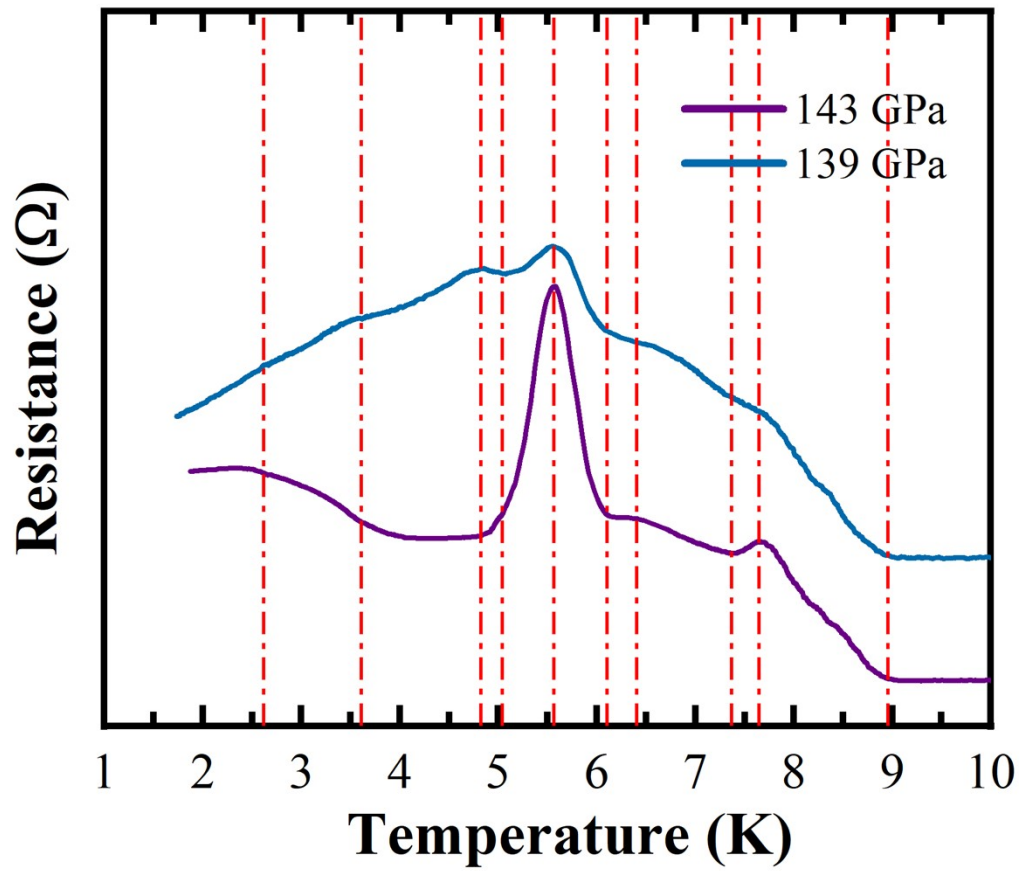

Figure S3. Two resistance measurements at 143 GPa and 139 GPa in Cell #3. Vertical reference lines indicate that the bends of two curves are in the same temperatures respectively.

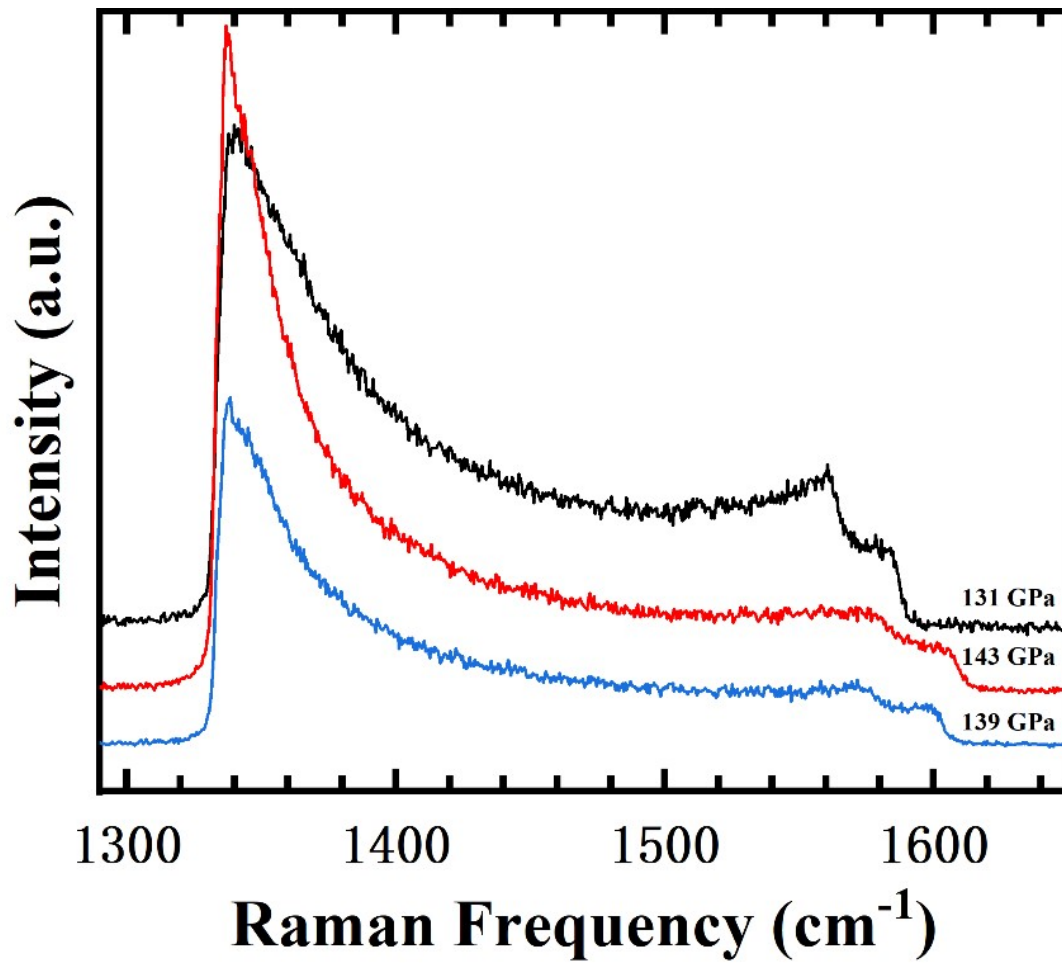

Figure S4. The pressure of Cell #3 determined by the first-order Raman spectra of diamond.

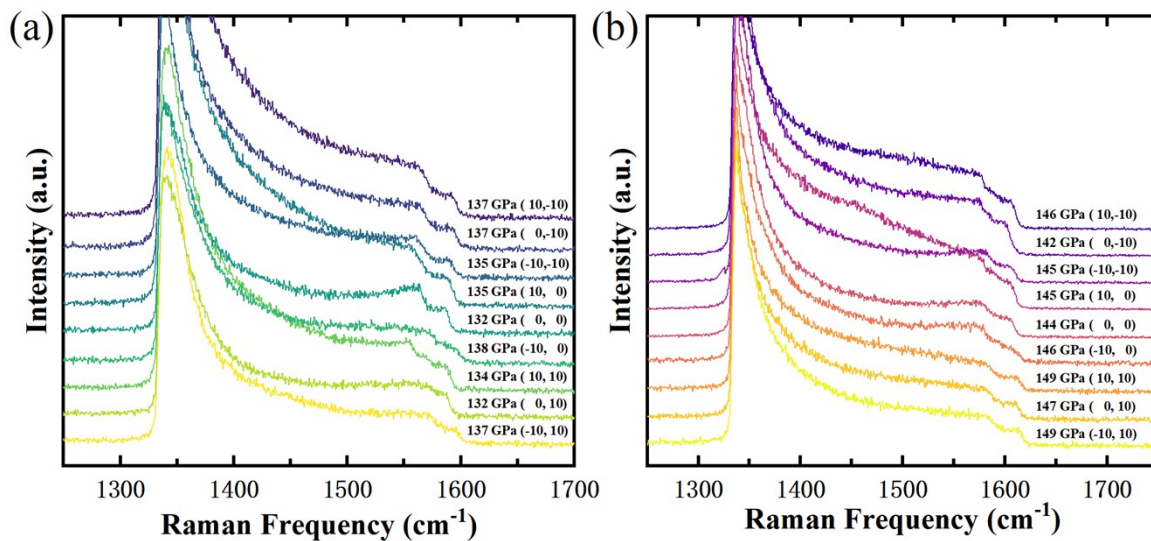

Figure S5. Raman spectra of diamond for Cell #3 at different positions. (a) Pressure measured in the center of diamond culet with a step of 10  $\mu\text{m}$  after the first laser heating. (b) Pressure measured in the center of diamond culet with a step of 10  $\mu\text{m}$  after the second laser heating.

Table S1. The lattice parameters and R-values of refinements in Cell #3.

| <i>P6<sub>3</sub>/mmc</i> Fe   |         |         |         |                     | Le Bail fit    |                 | Rietveld fit |
|--------------------------------|---------|---------|---------|---------------------|----------------|-----------------|--------------|
| Cell                           | P (GPa) | a=b (Å) | c (Å)   | V (Å <sup>3</sup> ) | R <sub>p</sub> | wR <sub>p</sub> | wR           |
| #3                             | 143     | 2.2527  | 3.6053  | 15.8445             | 48.05          | 64.40           | 40.41        |
| <i>I4/mmm</i> FeH <sub>5</sub> |         |         |         |                     | Le Bail fit    |                 | Rietveld fit |
| Cell                           | P (GPa) | a=b (Å) | c (Å)   | V (Å <sup>3</sup> ) | R <sub>p</sub> | wR <sub>p</sub> | wR           |
| #3                             | 139     | 2.4172  | 11.6647 | 68.1552             | 48.88          | 65.49           | 49.90        |

## Reference

1. H.-k. Mao and R. J. Hemley, *Rev. Mod. Phys.*, 1994, **66**, 671-692.
2. M. I. Erements and I. A. Troyan, *Nat Mater*, 2011, **10**, 927-931.
3. R. T. Howie, C. L. Guillaume, T. Scheler, A. F. Goncharov and E. Gregoryanz, *Phys. Rev. Lett.*, 2012, **108**, 125501.
4. A. F. Goncharov, R. T. Howie and E. Gregoryanz, *Low Temp. Phys.*, 2013, **39**, 402-408.
